# Supplementary material for: Birth of protein folds and functions in the virome
Source: PubMed Central journal article supplement (PMC11410667; doi:10.1038/s41586-024-07809-y), 2024-08-26
Supplement: 41586_2024_7809_MOESM1_ESM.pdf [file 41586_2024_7809_MOESM1_ESM.pdf]

**Supplementary information**

---

**Birth of protein folds and functions in the virome**

---

In the format provided by the authors and unedited

## Birth of protein folds and functions in the virome

Jason Nomburg<sup>1,2,3</sup>, Erin E. Doherty<sup>3,4</sup>, Nathan Price<sup>1,2,3</sup>, Daniel Bellieny-Rabelo<sup>3,4</sup>, Yong K  
Zhu<sup>1,2,3</sup>, Jennifer A. Doudna<sup>1,2,3,4,5,6,7</sup>

<sup>1</sup>Gladstone-UCSF Institute of Data Science and Biotechnology; San Francisco, CA, USA

<sup>2</sup>Department of Molecular and Cell Biology, University of California, Berkeley; Berkeley, CA, USA

<sup>3</sup>Innovative Genomics Institute; University of California, Berkeley, CA, USA

<sup>4</sup>California Institute for Quantitative Biosciences, University of California, Berkeley; Berkeley, CA, USA.

<sup>5</sup>Howard Hughes Medical Institute, University of California, Berkeley; Berkeley CA, USA

<sup>6</sup>Molecular Biophysics and Integrated Bioimaging Division, Lawrence Berkeley National Laboratory; Berkeley, CA, USA.

<sup>7</sup>Department of Chemistry, University of California, Berkeley; Berkeley, CA, USA.

\*Corresponding author: [doudna@berkeley.edu](mailto:doudna@berkeley.edu)

**Supplementary Fig. 1 - Uncropped blot and TLC images**

**Fig 4E**

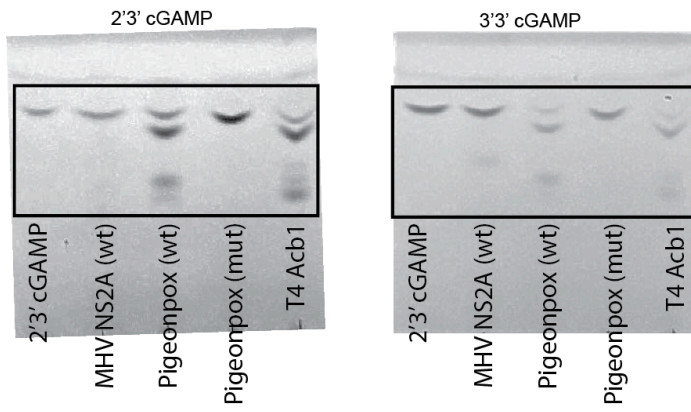

**Supplementary Fig. 9A**

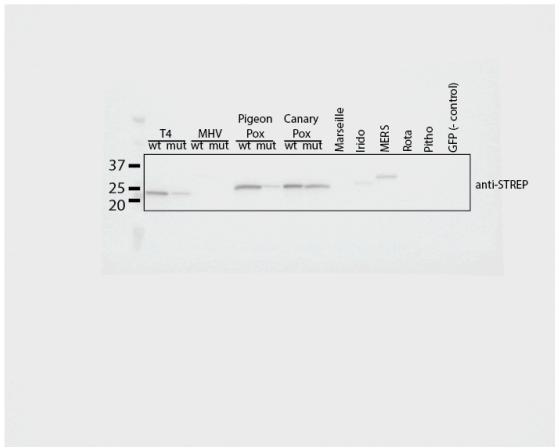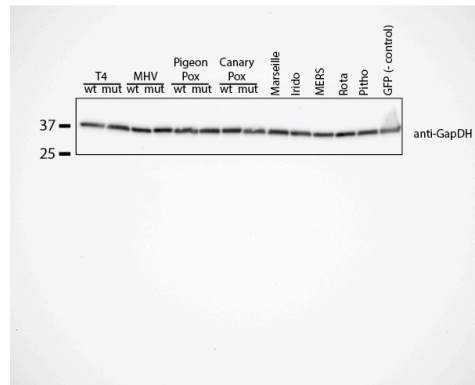

**Supplementary Fig. 9C**

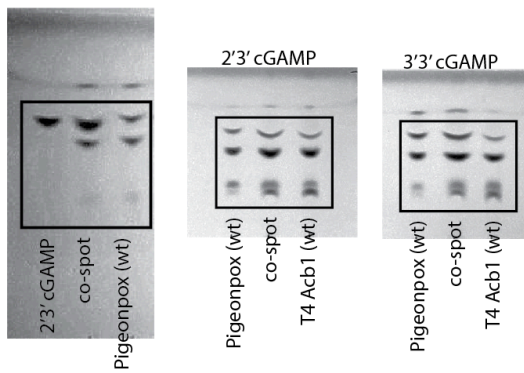

**Supplementary Fig 1. - Uncropped blot and TLC images for Fig 4E and Supplementary Figs 9A and 9C.**
